# Supplementary material
Source: PubMed Central journal article supplement (PMC5826132)
Supplement: AAC.01686-17_zac003186916s1.pdf [file AAC.01686-17_zac003186916s1.pdf]

# **Modeling the emergence of antibiotic resistance in the environment: An analytical solution for the minimum selection concentration**

Ben K. Greenfield, Shanna Shaked, Carl F. Marrs, Patrick Nelson, Ian Raxter, Chuanwu Xi, Thomas E. McKone, and Olivier Jolliet

## **Corresponding Author:**

Ben Greenfield

Department of Environmental Sciences

Southern Illinois University – Edwardsville

Edwardsville, IL 62026, USA

email: [begreen@siue.edu](mailto:begreen@siue.edu)

## **Supplemental material (23 pages)**

- pg. 2 1. Supplemental text on model definitions, derivation, and assumptions
  - 1.1. Selection coefficient
  - 1.2. Converting MIC to EC<sub>50</sub>
  - 1.3. Derivation of MSC/MIC<sub>s</sub> ratio
  - 1.4. Effect of assuming same  $\kappa$  and  $N_{\min}$  for sensitive versus resistant strains
- pg. 6 2. Supplemental text on model evaluation methods
  - 2.1. PRESS statistic and other model diagnostic statistics
- pg. 8 Supplemental Tables
- pg. 13 Supplemental Figures
- pg. 22 References for Supplemental Material

## 1. Supplemental text on model definitions, derivation, and assumptions

### 1.1. Selection coefficient

Relative fitness between strains is a key determining factor governing bacterial competition (1). Relative fitness is often conceptualized as a fitness cost (2–4), or as a selection coefficient (4–9). These parameters indicate the intrinsic fitness difference between bacteria strains (e.g., sensitive vs. resistant), as a result of a specific antibiotic resistance mechanism. To achieve mathematical consistency among the different terms, we now summarize how the selection coefficient is measured in the laboratory as a rate (the absolute selection coefficient ( $\sigma$  [ $\text{h}^{-1}$ ]) or in relative terms (sc, adimensional) and then relate it to the fitness cost (fc).

#### 1.1.1. Absolute selection coefficient ( $\sigma$ )

The selection coefficient is a measurement of the impact of a particular heritable trait on intrinsic growth rate, and consequent rate of selection for or against that trait in competition experiments. In evaluating resistance mechanisms, selection can favor sensitive strains (sensitive more fit than resistant), resistant strains (resistant more fit than sensitive), or exhibit no difference between strains. We focus on the common case where selection favors sensitive strains.

Selection experiments calculate relative fitness based on differences in the ratio of measured biomass density (or cell count) over time ( $B_i$ ) between strains(1, 8, 10):

$$\sigma = [\ln(B_{r,t}/B_{s,t}) - \ln(B_{r,t=0}/B_{s,t=0})]/t \quad (\text{S1})$$

Here, the subscript  $t = 0$  indicates biomass measured at the beginning of the experiment. The following calculations demonstrate that  $\sigma$  is in units of  $t^{-1}$  (e.g.,  $\text{h}^{-1}$ ):

$$B_{r,t} = B_{r,t=0} \times (e^{N_{\text{int},r}t}); B_{s,t} = B_{s,t=0} \times (e^{N_{\text{int},s}t}) \quad (\text{S2})$$

$$\sigma = \frac{\ln\left(\frac{B_{r,t=0} \times e^{N_{\text{int},r}t}}{B_{s,t=0} \times e^{N_{\text{int},s}t}}\right) - \ln\left(\frac{B_{r,t=0}}{B_{s,t=0}}\right)}{t} = \frac{\ln\left(\frac{e^{N_{\text{int},r}t}}{e^{N_{\text{int},s}t}}\right)}{t} = \frac{\ln(e^{N_{\text{int},r}t}) - \ln(e^{N_{\text{int},s}t})}{t} = N_{\text{int},r} - N_{\text{int},s} \quad (\text{S3})$$

where  $N_{\text{int},s}$  and  $N_{\text{int},r}$  are the intrinsic net growth rate in the absence of antibiotic (of sensitive (s) and resistant (r) bacteria), represented as:

$$N_{\text{int}} = R_{\text{int}} - D_{\text{int}} \quad (\text{S4})$$

and  $R_{int}$  is intrinsic growth rate, and  $D_{int}$  is loss due to mortality or, in continuous cultures, dilution.

We see that  $\sigma$  is therefore equal to the difference in net growth rate between the two strains and has units of  $[h^{-1}]$  as mentioned above. This is the experimental selection coefficient ( $\sigma$ ) determined by Gullberg et al. and elsewhere (5, 6, 8, 11).

### 1.1.2. Dimensionless selection coefficient (sc)

It is also possible to define a dimensionless selection coefficient (sc) obtained by dividing the inverse of the selection coefficient ( $-\sigma$ ) by the net growth rate of the sensitive strain (Eq. 9 in the text):

$$sc = -\frac{\sigma}{N_{int,s}} = \frac{N_{int,s} - N_{int,r}}{N_{int,s}} = 1 - \frac{N_{int,r}}{N_{int,s}} \quad (S5)$$

### 1.2. Converting MIC to $EC_{50}$

To convert the MIC value of a strain to its corresponding  $EC_{50}$  value, we first substitute  $a = MIC$  into the equation for death due to antibiotic (Eq. 3) to obtain  $D_{ab}(MIC) = k_{max} \frac{MIC^\kappa}{MIC^\kappa + (EC_{50})^\kappa}$ . We will demonstrate this for the sensitive strain. We first recognize that:

$$D_{ab,s}(MIC) = k_{max,s} \frac{(MIC_s)^\kappa}{(MIC_s)^\kappa + (EC_{50,s})^\kappa} = (R_{int} - D_{int} - N_{min}) \frac{(MIC_s)^\kappa}{(MIC_s)^\kappa + (EC_{50,s})^\kappa} = R_{int} - D_{int} \quad (S6)$$

based on  $k_{max} = R_{int} - D_{int} - N_{min}$  (Eq. 4), and the observation of zero net growth rate at the MIC: i.e.,  $D_{ab,s}(MIC_s) = N_{int} = R_{int} - D_{int}$ . Algebraically solving for the  $EC_{50,s}$  term, we find that:

$$EC_{50,s} = MIC_s \left( \frac{-N_{min}}{R_{int} - D_{int}} \right)^{\frac{1}{\kappa}} \quad (S7)$$

Thus, for a given set of conditions ( $\kappa, R_{int}, D_{int}, N_{min}$ ),  $EC_{50,s}$  is simply a constant multiple of the sensitive strain MIC. For the resistant strain, the  $EC_{50,r}$  is obtained by the same solution, substituting  $MIC_r$  and replacing  $R_{int}$  by  $(R_{int} + \sigma)$  per Eq. 2, such that:

$$EC_{50,r} = MIC_r \left( \frac{-N_{min}}{R_{int} + \sigma - D_{int}} \right)^{\frac{1}{\kappa}} \quad (S8)$$

These relationships can be employed to convert the generalized Hill equation formulation of  $D_{ab}(a) = k_{max} \frac{a^\kappa}{a^\kappa + (EC_{50})^\kappa}$  (Eq. 3) to an MIC based formulation, by substituting the MIC equation

for EC<sub>50</sub> (employing Eqs. S7 and S8, above). Recalling the net growth rates without antibiotic (i.e.,  $N_{int,s} = R_{int} - D_{int}$ ):

$$D_{ab,s}(a) = (N_{int,s} - N_{min}) \frac{a^\kappa}{a^\kappa + \frac{(-N_{min})}{N_{int,s}} (MIC_s)^\kappa} \text{ and } D_{ab,r}(a) = (N_{int,r} - N_{min}) \frac{a^\kappa}{a^\kappa + \frac{(-N_{min})}{N_{int,r}} (MIC_r)^\kappa}.$$

These are Eqs. 5 and 6, respectively in the text.

### 1.3. Derivation of MSC/MIC<sub>s</sub> ratio

To obtain MSC as a function of MIC<sub>s</sub>, we begin by noting that at the MSC, the difference in net growth rate is equal to zero as defined in Eq. 8 in the text:

$$\Delta N(a = MSC) = N_{int,r} - N_{int,s} + D_{ab,s}(a = MSC) - D_{ab,r}(a = MSC) = 0$$

Incorporating Eqs. 5 and 6:

$$\Delta N(MSC) = N_{int,r} - N_{int,s} + (N_{int,s} - N_{min}) \frac{(MSC)^\kappa}{(MSC)^\kappa + \frac{(-N_{min})}{N_{int,s}} (MIC_s)^\kappa} - (N_{int,r} - N_{min}) \frac{(MSC)^\kappa}{(MSC)^\kappa + \frac{(-N_{min})}{N_{int,r}} (MIC_r)^\kappa} = 0 \quad (S9)$$

To obtain the ratio MSC/MIC<sub>s</sub>, we divide numerator and denominator by MIC<sub>s</sub><sup>κ</sup>:

$$\begin{aligned} \Delta N(MSC) &= N_{int,r} - N_{int,s} + (N_{int,s} - N_{min}) \frac{(MSC/MIC_s)^\kappa}{(MSC/MIC_s)^\kappa + \frac{(-N_{min})}{N_{int,s}}} - (N_{int,r} - N_{min}) \frac{(MSC/MIC_s)^\kappa}{(MSC/MIC_s)^\kappa + \frac{(-N_{min})}{N_{int,r}} (MIC_r/MIC_s)^\kappa} \quad (S10) \\ &= 0 \end{aligned}$$

From Eq. S10, the algebraic solution was obtained for (MSC/MIC<sub>s</sub>)<sup>κ</sup> employing the Equations and Systems Solver (“solve” function) in MATLAB (Symbolic Math Toolbox, R2013a, MathWorks, Natick, MA, USA). The general solution satisfying this equation is:

$$(MSC/MIC_s)^\kappa = \frac{N_{min} (MIC_r/MIC_s)^\kappa (N_{int,r} - N_{int,s})}{(MIC_r/MIC_s)^\kappa N_{int,s} (N_{int,r} - N_{min}) + N_{int,r} (N_{min} - N_{int,s})} \quad (S11)$$

$$(MSC/MIC_s)^\kappa = \frac{(-N_{int,r} + N_{int,s})}{N_{int,s} \left(1 + \frac{N_{int,r}}{-N_{min}}\right) + \frac{N_{int,r} (N_{min} - N_{int,s})}{(MIC_r/MIC_s)^\kappa (-N_{min})}} = \frac{(N_{int,s} - N_{int,r})/N_{int,s}}{\left(1 + \frac{N_{int,r}}{-N_{min}}\right) \frac{N_{int,r} (N_{int,s} - N_{min})}{N_{int,s} (MIC_r/MIC_s)^\kappa (-N_{min})}} \quad (S12)$$

In order to make the selection coefficient explicit, Eq. S11 can be transformed employing the dimensionless selection coefficient (sc) by introducing Eq. 9; i.e.,  $N_{int,s} - N_{int,r} = (sc N_{int,s})$ , and  $N_{int,r} = N_{int,s} (1 - sc)$ , obtaining:

$$(MSC/MIC_s)^\kappa = \frac{-N_{min} N_{int,s} (MIC_r/MIC_s)^\kappa sc}{(MIC_r/MIC_s)^\kappa N_{int,s} (N_{int,r} - N_{min}) + N_{int,s} (1 - sc) (N_{min} - N_{int,s})} \quad (S13)$$

Dividing the numerator and denominator by  $-N_{\min}N_{\text{int},s}(\text{MIC}_r/\text{MIC}_s)^\kappa$  obtains:

$$(\text{MSC}/\text{MIC}_s)^\kappa = \frac{sc}{\frac{(N_{\text{int},r}-N_{\min})(1-sc)(N_{\min}-N_{\text{int},s})}{-N_{\min}} + \frac{(1-sc)(N_{\min}-N_{\text{int},s})}{-N_{\min}(\text{MIC}_r/\text{MIC}_s)^\kappa}} \quad (\text{S14})$$

and elevating both sides of the equation to power  $\kappa^{-1}$  and rearranging:

$$\text{MSC}/\text{MIC}_s = \left( \frac{sc}{1 - \frac{N_{\text{int},r}}{N_{\min}} - \frac{(1-sc)\left(1 - \frac{N_{\text{int},s}}{N_{\min}}\right)}{\left(\frac{\text{MIC}_r}{\text{MIC}_s}\right)^\kappa}} \right)^{\frac{1}{\kappa}} \quad (\text{S15})$$

Finally, this is depicted with  $N_{\min}$  as a negative term since the minimal growth rate is often negative, giving us Eqn. 10 in the text:

$$\text{MSC}/\text{MIC}_s = \left( \frac{sc}{1 + \frac{N_{\text{int},r}}{-N_{\min}} - \frac{(1-sc)\left(1 + \frac{N_{\text{int},s}}{-N_{\min}}\right)}{\left(\frac{\text{MIC}_r}{\text{MIC}_s}\right)^\kappa}} \right)^{\frac{1}{\kappa}}$$

To represent this in terms of the experimentally derived selection parameters ( $\sigma$ ) in Gullberg et al. (8, 11), we simply note that  $sc = -\sigma / N_{\text{int},s}$  (Eq. 9):

$$\text{MSC}/\text{MIC}_s = \left( \frac{\frac{-\sigma}{N_{\text{int},s}}}{1 + \frac{N_{\text{int},r}}{-N_{\min}} - \frac{\left(1 + \frac{\sigma}{N_{\text{int},s}\right)\left(1 + \frac{N_{\text{int},s}}{-N_{\min}}\right)}{\left(\frac{\text{MIC}_r}{\text{MIC}_s}\right)^\kappa}} \right)^{\frac{1}{\kappa}} \quad (\text{S16})$$

#### ***1.4. Effect of assuming same $\kappa$ and $N_{\min}$ for sensitive versus resistant strains***

To arrive at an analytical solution for  $\text{MSC}/\text{MIC}_s$  (Eq. 10), it was necessary to assume identical  $N_{\min}$  and  $\kappa$  for sensitive versus resistant strains. A simple Monte Carlo Simulation-based sensitivity analysis was employed to evaluate the importance of sensitive versus resistant strain  $N_{\min}$  and  $\kappa$ , and consequently which growth parameter in which strain is most important, for predicting MSC. In the simulation, the MSC was directly calculated by solving for  $\Delta N = 0$  in Eq. 8, while relaxing the assumptions of identical  $N_{\min}$  and  $\kappa$  in Eqs. 5 and 6. Separate parameters

were established for sensitive ( $N_{\min,s}$ ,  $\kappa_s$ ) versus resistant strains ( $N_{\min,r}$ ,  $\kappa_r$ ), resulting in the following formulations of antibiotic dependent growth reduction to be substituted into Eq. 8:

$$D_{ab,s}(a) = (N_{int,s} - N_{\min,s}) \frac{(a)^{\kappa_s}}{(a)^{\kappa_s} + \frac{(N_{\min,s})}{N_{int,s}} (MIC_s)^{\kappa_s}} \quad (S17)$$

$$D_{ab,r}(a) = (N_{int,r} - N_{\min,r}) \frac{(a)^{\kappa_r}}{(a)^{\kappa_r} + \frac{(N_{\min,r})}{N_{int,r}} (MIC_r)^{\kappa_r}} \quad (S18)$$

Two scenarios were simulated, each including 20,000 parameter sets. In both scenarios,  $MIC_s$  was set at 20. In order to examine the influence of varying growth rate parameters in the presence of either small or large increases in resistance,  $MIC_r$  was set at 30 and 200 in the first and second scenarios, respectively.  $N_{\min,s}$ ,  $N_{\min,r}$ ,  $\kappa_s$ , and  $\kappa_r$  were separately selected from uniform distributions with fixed ranges, listed in Table S1. Intrinsic growth rates were fixed at  $N_{int,s} = 2$ , and  $N_{int,r} = 1.8$ . Sensitivity was estimated by comparing spearman rank correlation coefficients ( $\rho$ ) between each of the four parameters and MSC.

In both scenarios, the predicted MSC was most sensitive to  $\kappa_s$ , and was not sensitive to either  $N_{\min}$  value (Table S1). In Scenario 1 ( $MIC_s$  close to  $MIC_r$ ), the MSC was moderately sensitive to  $\kappa_r$ , but in Scenario 2, where  $MIC_r$  was 10 times  $MIC_s$ , the MSC was only sensitive to  $\kappa_s$ . These results indicate that  $\kappa_s$  is the most important parameter to estimate empirically in order to predict MSC, and that  $\kappa_r$  only contributes to understanding MSC when  $MIC_r$  is quite close to  $MIC_s$ . As a result, the assumptions that  $\kappa = \kappa_s = \kappa_r$  and  $N_{\min} = N_{\min,s} = N_{\min,r}$  will not impede prediction of MSC, provided that effort is made to determine  $\kappa_s$ , empirically.

## 2. Supplemental text on model evaluation methods

### 2.1. PRESS statistic and other model diagnostic statistics

For the convenience of the reader, we provide standard statistical definitions in this section of the Supplemental Material. Total and residual sum of squares (SSY and SSE, respectively) are the standard terms. The total sum of squares (SSY) is the calculation of sum of squared differences between each individual response ( $y_i$ ) and the average response,  $\bar{y}$ :

$$SSY = \sum_{i=1}^n (y_i - \bar{y})^2.$$

In this study,  $y$  represents  $\Delta N$ , the growth rate difference between sensitive and resistant strain. The residual sum of squares (SSE) is:

$$SSE = \sum_{i=1}^n (y_i - \hat{y}_i)^2$$

where  $\hat{y}_i$  = fitted model prediction for observation  $i$ . As always, model  $R^2 = 1 - (SSE/SSY)$ . Analogous to SSE, the PRESS (predictive residual error sum of squares) statistic is a residual sum of squares between each empirical observation and model fit to the data set with that individual observation removed:

$$PRESS = \sum_{i=1}^n (y_i - \hat{y}_{i,-i})^2$$

Here  $\hat{y}_{i,-i}$  = prediction for observation  $i$  based on a model fitted using the data set with observation  $i$  removed. PRESS is therefore a jackknife estimate of dependence of model fit on individual observations; i.e., a leave-one-out cross-validation technique. Useful results for evaluating model fit include  $Q^2$ , the cross validated  $R^2$ :

$$Q^2 = 1 - (PRESS/TSS).$$

$Q^2$ , and also  $PRESS/SSY$  are validation techniques that provide information regarding the predictive ability of the model for observations not employed in the estimation of the model.  $Q^2$  is a direct measure of model predictive power, analogous to  $R^2$ , but for out-of-model observations (and therefore less susceptible to overfitting). When  $PRESS/SSY < 1$ , the model predicts the data better than chance, and further decreases of  $PRESS/SSY$  down towards 0 represent progressive improvements in model predictive ability (12).  $R^2$ ,  $Q^2$ , and  $PRESS/SSY$  were calculated in MATLAB for all fitted models.

**Table S1.** Monte Carlo Simulation evaluate sensitivity of MSC to differing values of  $\kappa$  and  $N_{\min}$  for susceptible (s) versus resistant (r) strains.

| Parameter    | Range<br>(min, max) | Spearman $\rho$                                            |                                                             |
|--------------|---------------------|------------------------------------------------------------|-------------------------------------------------------------|
|              |                     | Scenario 1<br>MIC <sub>s</sub> = 20, MIC <sub>r</sub> = 30 | Scenario 2<br>MIC <sub>s</sub> = 20, MIC <sub>r</sub> = 200 |
| $\kappa_s$   | 0.5, 10             | +0.83                                                      | +0.97                                                       |
| $\kappa_r$   | 0.5, 10             | -0.39                                                      | -0.09                                                       |
| $N_{\min,s}$ | -10, -1             | -0.09                                                      | -0.11                                                       |
| $N_{\min,r}$ | -10, -1             | +0.03                                                      | +0.003                                                      |



**Table S2.** Complete results from all model fitting. Fitted: which parameters were varied to allow fitting to observed data. Averaged: whether data were averaged from each antibiotic concentration and strain, or raw data from each experiment. n: sample size. Initial  $\kappa$ : starting  $\kappa$  value in nonlinear estimation. CV  $\kappa$  range: range of  $\kappa$  results in leave one out cross validation.  $Q^2 = \text{cross validated } R^2 = 1 - (\text{PRESS}/\text{TSS})$ .

| Scenario:        |                         | Results:           |          |         |                 |                  |          |                      |                       |       |       |               |               |                |
|------------------|-------------------------|--------------------|----------|---------|-----------------|------------------|----------|----------------------|-----------------------|-------|-------|---------------|---------------|----------------|
| Compound         | Taxa                    | Fitted             | Averaged | Strains | n               | Initial $\kappa$ | $\kappa$ | CV $\kappa$<br>range | $N_{\min}$            | $Q^2$ | $R^2$ | PRESS/<br>SSY | PRESS/<br>SSE | Data<br>Source |
| As               | <i>E. coli</i>          | K                  | No       | 2       | 20              | 1                | 0.7      | 0.7                  | -2                    | 0.81  | 0.84  | 0.30          | 1.14          | (11)           |
| As               | <i>E. coli</i>          | K                  | Yes      | 2       | 5               | 1                | 0.7      | 0.7 – 0.8            | -2                    | 0.80  | 0.92  | 0.29          | 2.44          | (11)           |
| As               | <i>E. coli</i>          | $\kappa, N_{\min}$ | No       | 2       | 20              | 1                | 1.2      | 1.1 – 1.2            | -0.2                  | 0.88  | 0.91  | 0.12          | 1.30          | (11)           |
| As               | <i>E. coli</i>          | $\kappa, N_{\min}$ | Yes      | 2       | 5               | 1                | 1.2      | 1.1 – 1.2            | -0.2                  | 0.99  | 1.00  | 0.01          | 24.1          | (11)           |
| CIP              | <i>E. coli</i>          | $\kappa$           | No       | 5       | 144             | 2                | 2.0      | 2.0                  | -2                    | 0.77  | 0.78  | 0.31          | 1.03          | (8)            |
| CIP              | <i>E. coli</i>          | $\kappa$           | Yes      | 5       | 24              | 2                | 2.0      | 1.9 – 2.0            | -2                    | 0.78  | 0.81  | 0.29          | 1.20          | (8)            |
| CIP <sup>a</sup> | <i>E. coli</i>          | $\kappa$           | Yes      | 4       | 18 <sup>a</sup> | 2                | 2.1      | 2.1                  | -2                    | 0.97  | 0.97  | 0.04          | 1.23          | (8)            |
| CIP              | <i>E. coli</i>          | $\kappa, N_{\min}$ | No       | 5       | 144             | 2                | 1.6      | 1.6 – 1.7            | -5.2e+8 <sup>b</sup>  | 0.78  | 0.79  | 0.32          | 1.03          | (8)            |
| CIP              | <i>E. coli</i>          | $\kappa, N_{\min}$ | Yes      | 5       | 24              | 2                | 1.6      | 1.6 – 1.9            | -3.8e+9 <sup>b</sup>  | 0.77  | 0.83  | 0.32          | 1.30          | (8)            |
| CIP <sup>a</sup> | <i>E. coli</i>          | $\kappa, N_{\min}$ | Yes      | 4       | 18 <sup>a</sup> | 2                | 2.4      | 2.3 – 2.4            | -0.8                  | 0.98  | 0.98  | 0.02          | 1.40          | (8)            |
| Cu               | <i>E. coli</i>          | $\kappa$           | No       | 2       | 8               | 2                | 1.9      | 1.8 – 2.1            | -2                    | 0.43  | 0.73  | 0.80          | 2.13          | (11)           |
| Cu               | <i>E. coli</i>          | $\kappa$           | Yes      | 2       | 4               | 2                | 1.9      | 1.8 – 3.1            | -2                    | c     | 0.88  | c             | c             | (11)           |
| Cu               | <i>E. coli</i>          | $\kappa, N_{\min}$ | No       | 2       | 8               | 2                | 5.7      | 3.5 – 6.3            | -0.0003               | 0.40  | 0.82  | 0.68          | 3.36          | (11)           |
| Cu               | <i>E. coli</i>          | $\kappa, N_{\min}$ | Yes      | 2       | 4               | 2                | 5.7      | 2.9 – 5.7            | -0.0003               | c     | 0.98  | c             | c             | (11)           |
| ERY              | <i>E. coli</i>          | $\kappa$           | No       | 3       | 64              | 2                | 3.5      | 3.4 – 3.5            | -2                    | 0.93  | 0.94  | 0.07          | 1.06          | (11)           |
| ERY              | <i>E. coli</i>          | $\kappa$           | Yes      | 3       | 11              | 2                | 3.4      | 3.3 – 3.5            | -2                    | 0.92  | 0.95  | 0.09          | 1.64          | (11)           |
| ERY              | <i>E. coli</i>          | $\kappa, N_{\min}$ | No       | 3       | 64              | 2                | 2.6      | 2.6                  | -4.0e+8 <sup>b</sup>  | 0.70  | 0.73  | 0.18          | 1.11          | (11)           |
| ERY              | <i>E. coli</i>          | $\kappa, N_{\min}$ | Yes      | 3       | 11              | 2                | 2.7      | 2.6                  | -3.4e+8 <sup>b</sup>  | 0.75  | 0.87  | 0.17          | 1.88          | (11)           |
| KAN              | <i>E. coli</i>          | $\kappa$           | No       | 2       | 72              | 2                | 10.5     | 10.4 – 10.6          | -2                    | -0.48 | -0.47 | 0.43          | 1.01          | (11)           |
| KAN              | <i>E. coli</i>          | $\kappa$           | Yes      | 2       | 5               | 2                | 10.5     | 7.1 – 10.8           | -2                    | -19.5 | -0.76 | 3.67          | 11.6          | (11)           |
| KAN              | <i>E. coli</i>          | $\kappa, N_{\min}$ | No       | 2       | 72              | 2                | 6.0      | 6.0 – 6.1            | -1.2e+11 <sup>b</sup> | -7.31 | -6.76 | 0.86          | 1.07          | (11)           |
| KAN              | <i>E. coli</i>          | $\kappa, N_{\min}$ | Yes      | 2       | 5               | 2                | 6.0      | 5.7 – 6.7            | -1.5e+11 <sup>b</sup> | -16.2 | -11.4 | 1.06          | 1.39          | (11)           |
| STR              | Salmonella <sup>d</sup> | $\kappa$           | No       | 2       | 87              | 2                | 5.0      | 5.0                  | -2                    | 0.66  | 0.67  | 0.25          | 1.02          | (8)            |
| STR              | Salmonella              | $\kappa$           | Yes      | 2       | 5               | 2                | 5.0      | 4.1 – 5.2            | -2                    | -1.05 | 0.70  | 1.47          | 6.87          | (8)            |
| STR              | Salmonella              | $\kappa, N_{\min}$ | No       | 2       | 87              | 2                | 3.4      | 3.4                  | -8.1e+11 <sup>b</sup> | -0.22 | -0.16 | 0.30          | 1.05          | (8)            |
| STR              | Salmonella              | $\kappa, N_{\min}$ | Yes      | 2       | 5               | 2                | 3.4      | 2.9                  | -1.0e+12 <sup>b</sup> | -2.35 | -0.26 | 0.77          | 2.66          | (8)            |
| TET              | <i>E. coli</i>          | $\kappa$           | No       | 3       | 60              | 2                | 1.6      | 1.6                  | -2                    | 0.89  | 0.89  | 0.09          | 1.03          | (11)           |
| TET              | <i>E. coli</i>          | $\kappa$           | Yes      | 3       | 10              | 2                | 1.6      | 1.6                  | -2                    | 0.94  | 0.95  | 0.05          | 1.19          | (11)           |
| TET              | <i>E. coli</i>          | $\kappa, N_{\min}$ | No       | 3       | 60              | 2                | 2.1      | 2.1 – 2.2            | -0.4                  | 0.90  | 0.91  | 0.07          | 1.08          | (11)           |
| TET              | <i>E. coli</i>          | $\kappa, N_{\min}$ | Yes      | 3       | 10              | 2                | 2.0      | 1.8 – 2.2            | -0.5                  | 0.93  | 0.96  | 0.05          | 1.70          | (11)           |

|     |                         |                     |     |   |     |   |     |           |       |      |      |      |      |      |
|-----|-------------------------|---------------------|-----|---|-----|---|-----|-----------|-------|------|------|------|------|------|
| TET | Salmonella <sup>d</sup> | κ                   | No  | 2 | 154 | 1 | 1.2 | 1.2       | -2    | 0.93 | 0.93 | 0.04 | 1.02 | (8)  |
| TET | Salmonella              | κ                   | Yes | 2 | 5   | 1 | 1.2 | 1.2       | -2    | 0.97 | 0.99 | 0.01 | 2.14 | (8)  |
| TET | Salmonella              | κ, N <sub>min</sub> | No  | 2 | 154 | 1 | 1.2 | 1.2       | -1.8  | 0.93 | 0.93 | 0.04 | 1.04 | (8)  |
| TET | Salmonella              | κ, N <sub>min</sub> | Yes | 2 | 5   | 1 | 1.2 | 1.0 – 1.5 | -2.1  | 0.91 | 0.99 | 0.04 | 7.70 | (8)  |
| TMP | <i>E. coli</i>          | κ                   | No  | 2 | 118 | 2 | 2.5 | 2.5       | -2    | 0.87 | 0.88 | 0.07 | 1.03 | (11) |
| TMP | <i>E. coli</i>          | κ                   | Yes | 2 | 5   | 2 | 2.5 | 2.5       | -2    | 0.99 | 0.99 | 0.01 | 1.19 | (11) |
| TMP | <i>E. coli</i>          | κ, N <sub>min</sub> | No  | 2 | 118 | 2 | 2.2 | 2.1 – 2.2 | -10.9 | 0.87 | 0.88 | 0.07 | 1.06 | (11) |
| TMP | <i>E. coli</i>          | κ, N <sub>min</sub> | Yes | 2 | 5   | 2 | 2.2 | 2.0 – 2.5 | -10.3 | 0.96 | 0.99 | 0.02 | 4.17 | (11) |

a. Simulation with *gyrA1(S83L)* removed. b. Model fitting insensitive to N<sub>min</sub>. c. Insufficient n for cross validation statistics (n = 4).

d. *Salmonella enterica* serovar Typhimurium LT2

**Table S3.** Comparison of MSC/MIC<sub>s</sub> ratios experimentally observed (8, 11) versus predicted by fitted model (Eq. 10) for different resistance mechanisms and compounds. Fitted: which parameters ( $\kappa$ ,  $N_{\min}$ ) were varied to allow fitting to observed data. Data are plotted in Fig. 3.

| Compound       | Taxa                    | Resistance gene          | MSC<br>observed<br>(ng ml <sup>-1</sup> ) | MIC <sub>s</sub><br>(ng ml <sup>-1</sup> ) | Ref. | MSC/MIC <sub>s</sub><br>observed | MSC/MIC <sub>s</sub><br>fitted $\kappa$ | MSC/MIC <sub>s</sub><br>fitted $\kappa$ , $N_{\min}$ |
|----------------|-------------------------|--------------------------|-------------------------------------------|--------------------------------------------|------|----------------------------------|-----------------------------------------|------------------------------------------------------|
| Arsenite       | <i>E. coli</i>          | pUUH239.2                | 90 <sup>a</sup>                           | 12,500 <sup>a</sup>                        | (11) | 0.0072                           | 0.0064                                  | 0.0077                                               |
| Trimethoprim   | <i>E. coli</i>          | pUUH239.2                | 33                                        | 190                                        | (11) | 0.174                            | 0.180                                   | 0.178                                                |
| Tetracycline   | <i>E. coli</i>          | pUUH239.2                | 45                                        | 750                                        | (11) | 0.060                            | 0.063                                   | 0.070                                                |
| Tetracycline   | <i>E. coli</i>          | <i>tetRA</i>             | 30                                        | 750                                        | (11) | 0.040                            | 0.014                                   | 0.021                                                |
| Erythromycin   | <i>E. coli</i>          | pUUH239.2                | 3000                                      | 12,000                                     | (11) | 0.250                            | 0.266                                   | 0.229                                                |
| Erythromycin   | <i>E. coli</i>          | <i>mph</i>               | < 200                                     | 12,000                                     | (11) | < 0.017                          | 0.074                                   | 0.044                                                |
| Kanamycin      | <i>E. coli</i>          | pUUH239.2                | 470                                       | 750                                        | (11) | 0.627                            | 0.656                                   | 0.532                                                |
| Cu(II) sulfate | <i>E. coli</i>          | pUUH239.2                | 90                                        | 1,300                                      | (11) | 0.069                            | 0.035                                   | 0.079                                                |
| Ciprofloxacin  | <i>E. coli</i>          | <i>GyrA1(S83L)</i>       | b                                         | 23                                         | (8)  | 0.0043                           | 0.024                                   | 0.017                                                |
| Ciprofloxacin  | <i>E. coli</i>          | <i>GyrA2(D87N)</i>       | b                                         | 23                                         | (8)  | 0.10                             | 0.088                                   | 0.080                                                |
| Ciprofloxacin  | <i>E. coli</i>          | $\Delta marR$            | b                                         | 23                                         | (8)  | 0.10                             | 0.097                                   | 0.094                                                |
| Ciprofloxacin  | <i>E. coli</i>          | $\Delta acrR$            | b                                         | 23                                         | (8)  | 0.10                             | 0.091                                   | 0.087                                                |
| Streptomycin   | Salmonella <sup>c</sup> | <i>rpsL105(K42R)</i>     | b                                         | 4,000                                      | (8)  | 0.25                             | 0.383                                   | 0.290                                                |
| Tetracycline   | Salmonella              | <i>cobA367::Tn10dtet</i> | b                                         | 1,500                                      | (8)  | 0.01                             | 0.0077                                  | 0.0077                                               |

a. Units are  $\mu$ M. b. Not reported in study. c. *Salmonella enterica* serovar Typhimurium LT2

**Table S4.** Laboratory growth parameters employed to illustrate ranges in MSC/MIC<sub>s</sub> ratios. For all simulations, MIC<sub>r</sub> was set at 10\*MIC<sub>s</sub>.

| <b>Compound</b>  | <b><math>\kappa</math></b> | <b>MIC<sub>s</sub> [<math>\mu\text{g ml}^{-1}</math>]</b> | <b>N<sub>int</sub> [<math>\text{h}^{-1}</math>]</b> | <b>N<sub>min</sub> [<math>\text{h}^{-1}</math>]</b> | <b>Reference</b>    |
|------------------|----------------------------|-----------------------------------------------------------|-----------------------------------------------------|-----------------------------------------------------|---------------------|
| Ciprofloxacin #1 | 1.42                       | 0.7                                                       | 1.59                                                | -15.7                                               | Ankomah et al. (13) |
| Ampicillin #1    | 4.53                       | 3.47                                                      | 1.57                                                | -1.16                                               | Ankomah et al. (13) |
| Tetracycline #1  | 1.46                       | 0.92                                                      | 1.30                                                | -8.32                                               | Ankomah et al. (13) |
| Tobramycin       | 2.67                       | 1.2                                                       | 1.08                                                | -16.6                                               | Ankomah et al. (13) |
| Ciprofloxacin #2 | 1.1                        | 0.03                                                      | 0.88                                                | -6.5                                                | Regoes et al. (14)  |
| Ampicillin #2    | 0.75                       | 8                                                         | 0.75                                                | -4.0                                                | Regoes et al. (14)  |
| Rifampin         | 2.5                        | 8                                                         | 0.70                                                | -4.3                                                | Regoes et al. (14)  |
| Streptomycin     | 1.9                        | 32                                                        | 0.89                                                | -8.8                                                | Regoes et al. (14)  |
| Tetracycline #2  | 0.61                       | 1                                                         | 0.81                                                | -8.1                                                | Regoes et al. (14)  |

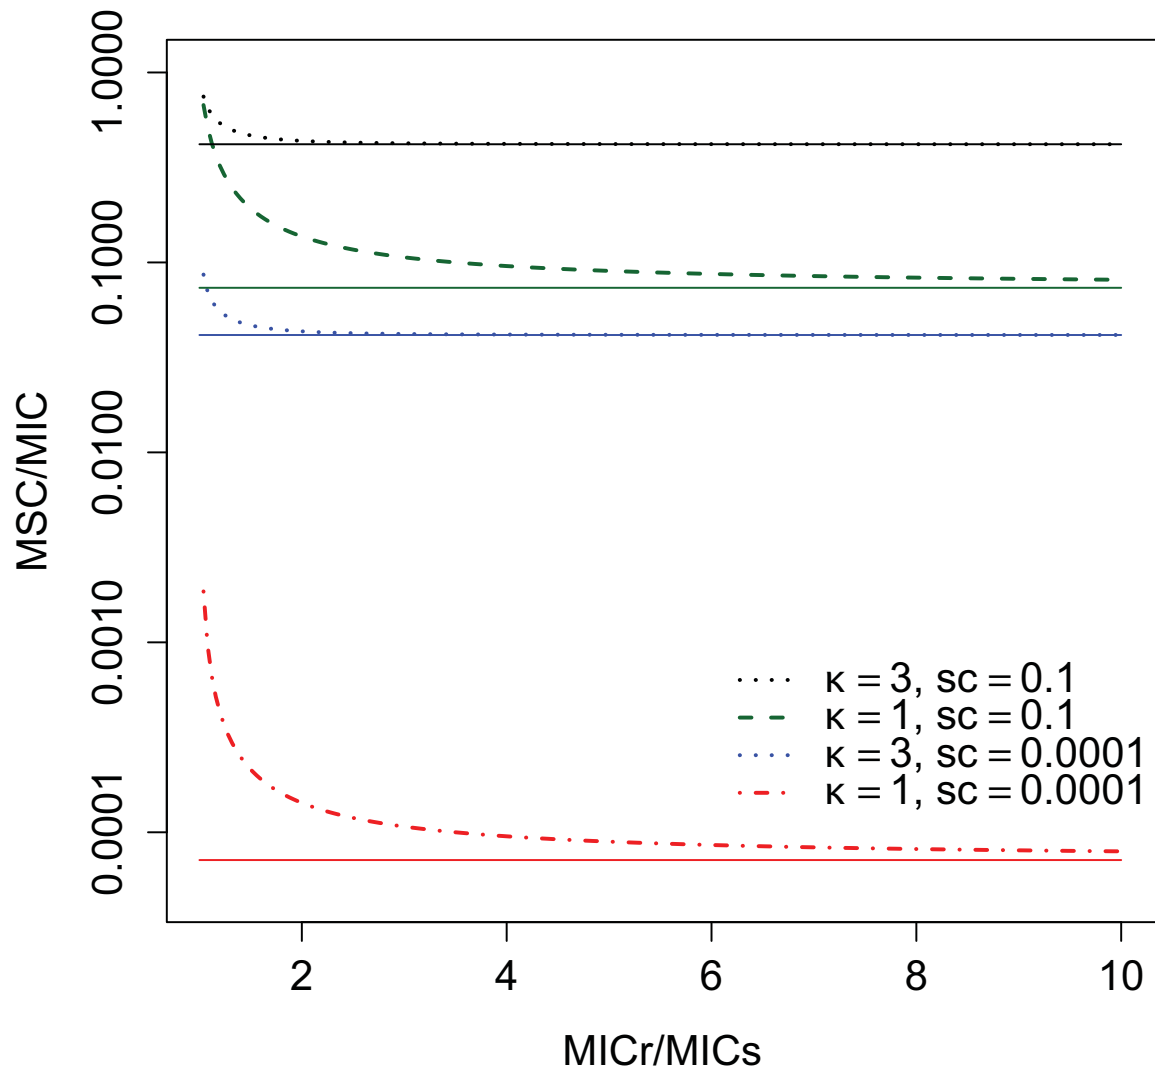

**Fig. S1.** Calculated MSC/MIC ratio as a function of  $MIC_r/MIC_s$  for different  $\kappa$  and  $sc$  values. Dotted lines are from the full form of the analytical solution (Eq. 10) and solid horizontal lines are from the simplified solution, which does not include  $MIC_r$  or  $MIC_s$  (Eq. 11). MSC/MIC is most sensitive to  $MIC_r/MIC_s$  when  $MIC_r < 2 \times MIC_s$  and the solutions converge for high  $MIC_r$ . Other parameter values:  $N_{min} = -5$ ;  $N_{int,s} = 2$ ;  $MIC_s = 25$ . Note log scale y-axis.

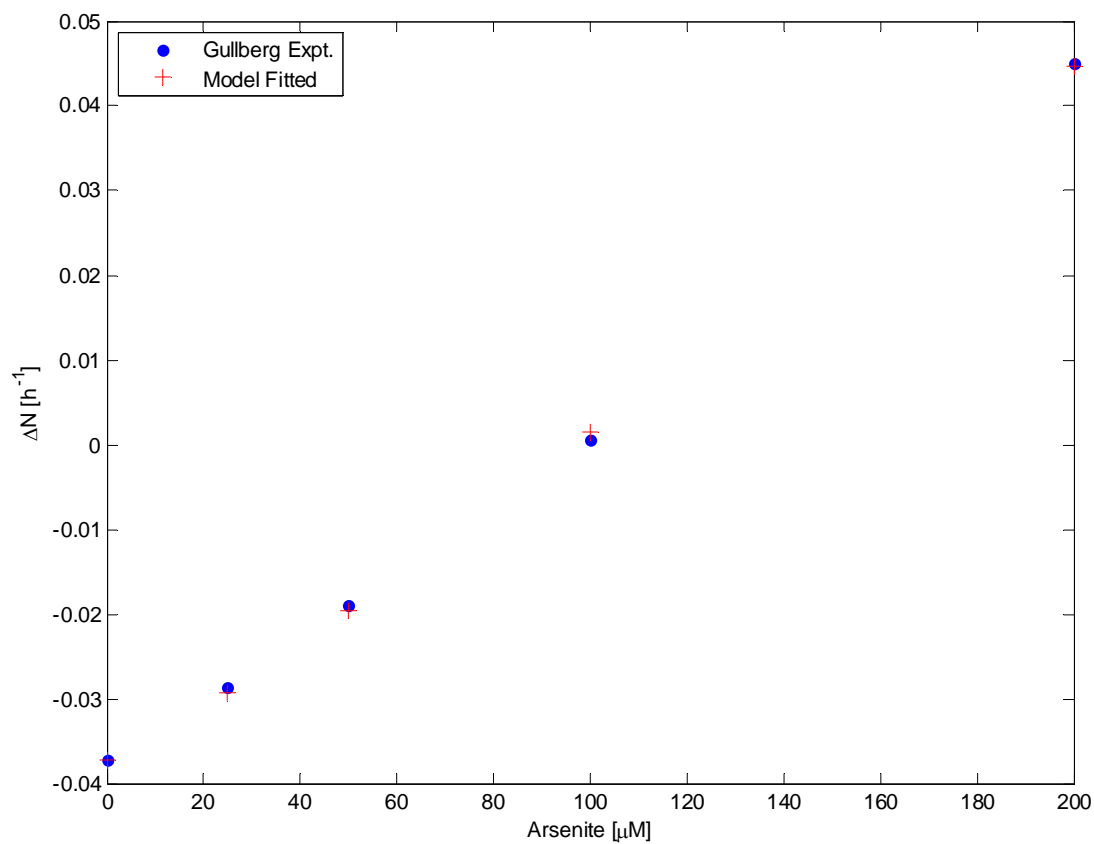

**Fig. S2.** Model fit to published (11) average growth rate differences ( $\Delta N$ ) for arsenite [ $\mu\text{M}$ ], employing *Escherichia coli* (data from , 11), fitting both  $\kappa$  and  $N_{\text{min}}$ .

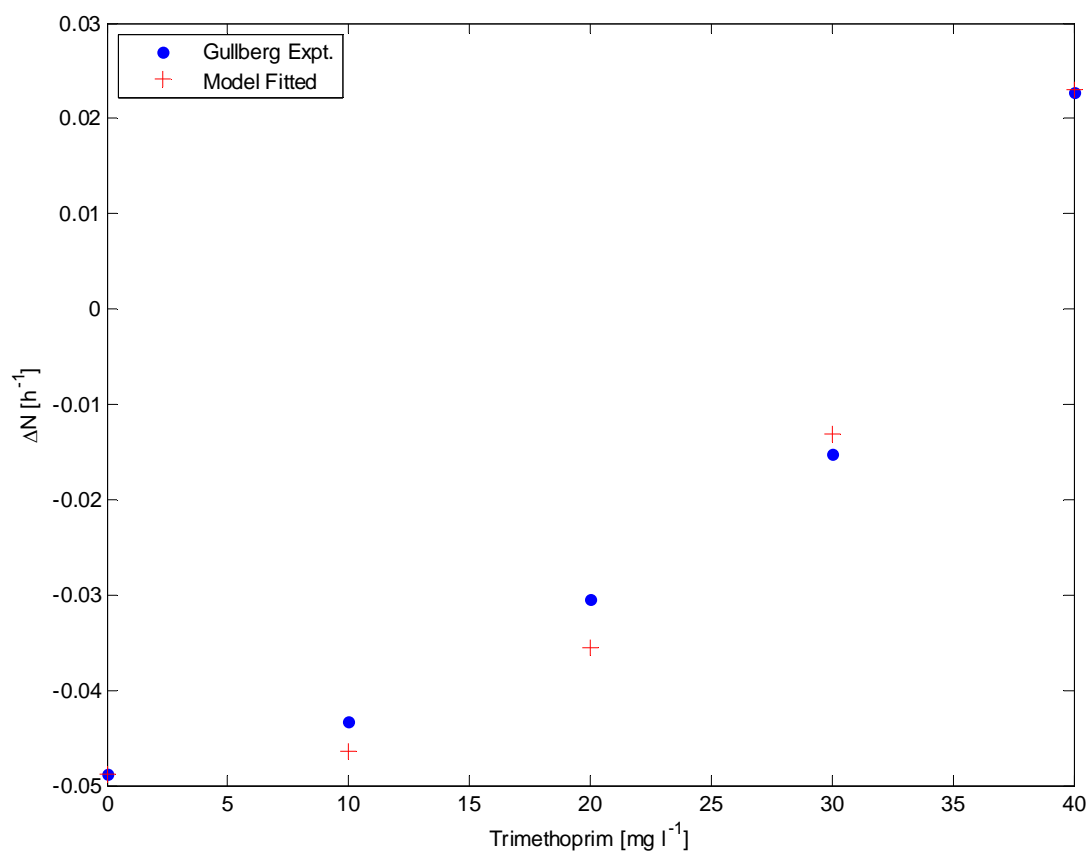

**Fig. S3.** Model fit to published (11) average growth rate differences ( $\Delta N$ ) for trimethoprim [ $\text{mg l}^{-1}$ ], employing *Escherichia coli* (data from , 11), fitting  $\kappa$  only ( $N_{\min} = -2$ ).

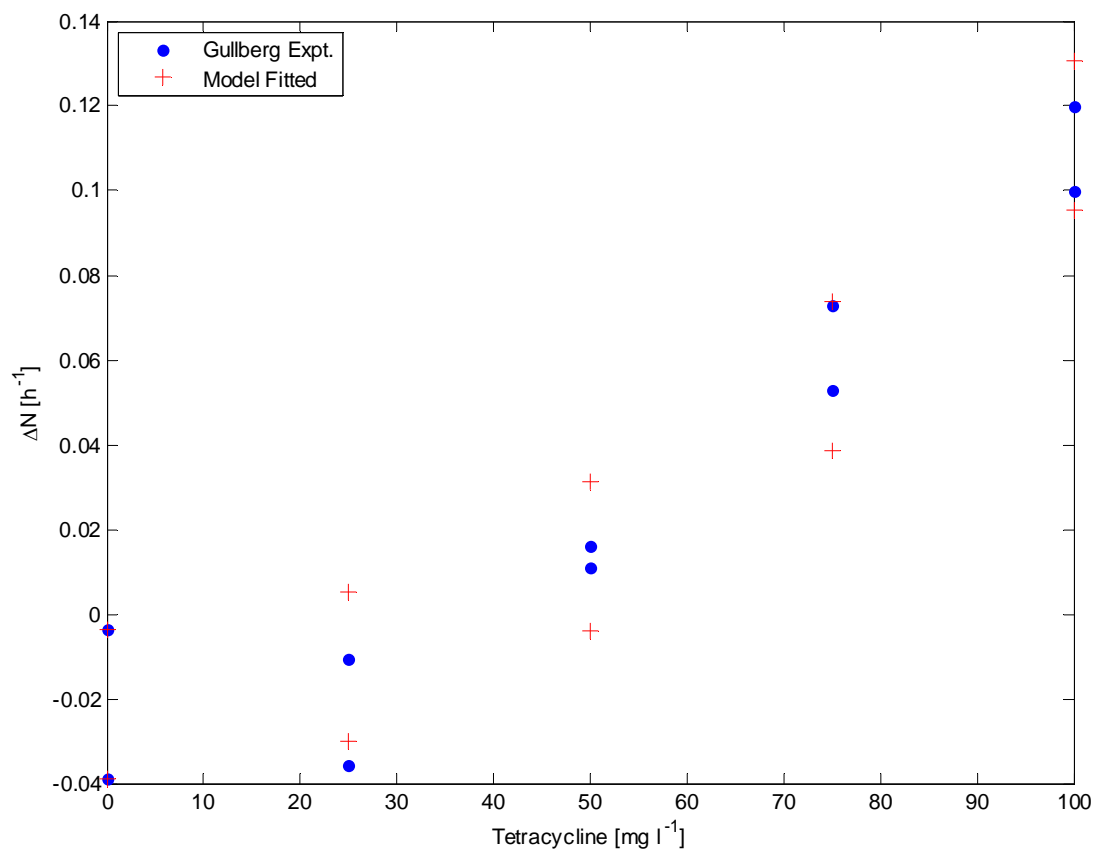

**Fig. S4.** Model fit to published (11) average growth rate differences ( $\Delta N$ ) for tetracycline, employing *Escherichia coli* (data from , 11), fitting both  $\kappa$  and  $N_{\min}$ .



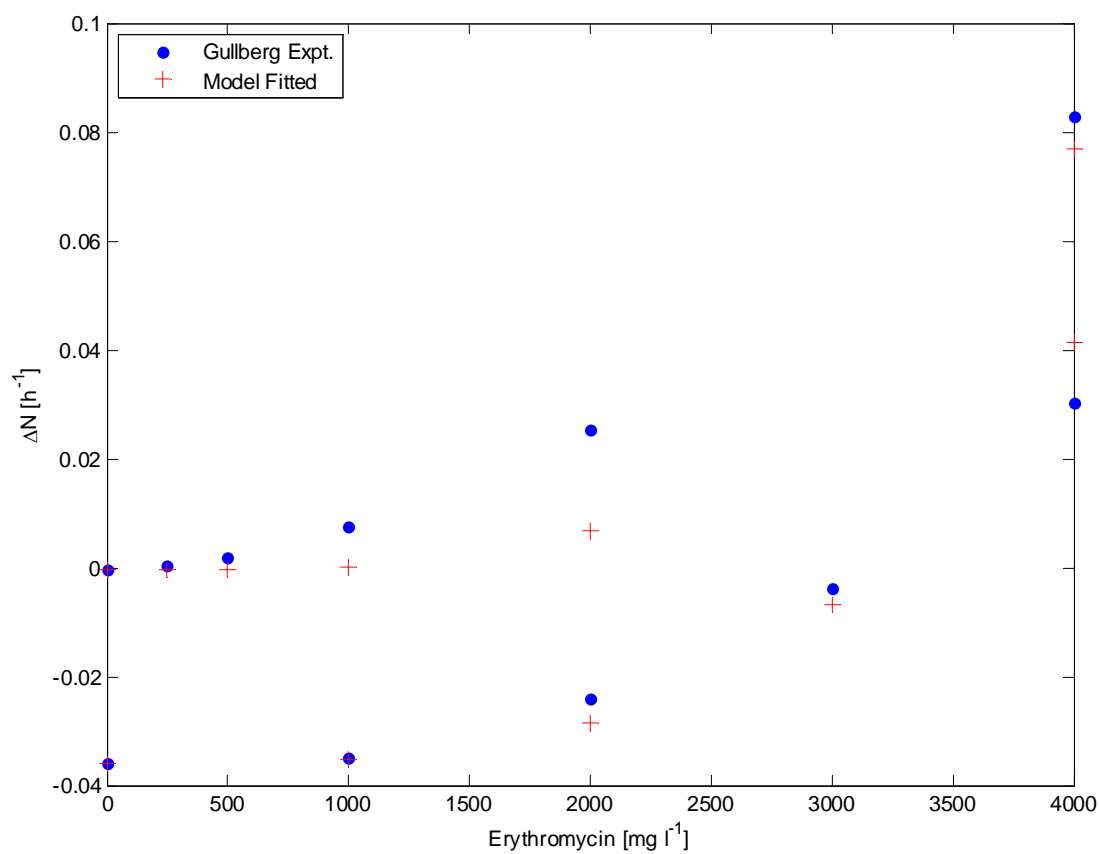

**Fig. S5.** Model fit to published (11) average growth rate differences ( $\Delta N$ ) for erythromycin [ $\text{mg l}^{-1}$ ], employing *Escherichia coli* (data from , 11), fitting  $\kappa$  only ( $N_{\min} = -2$ ).

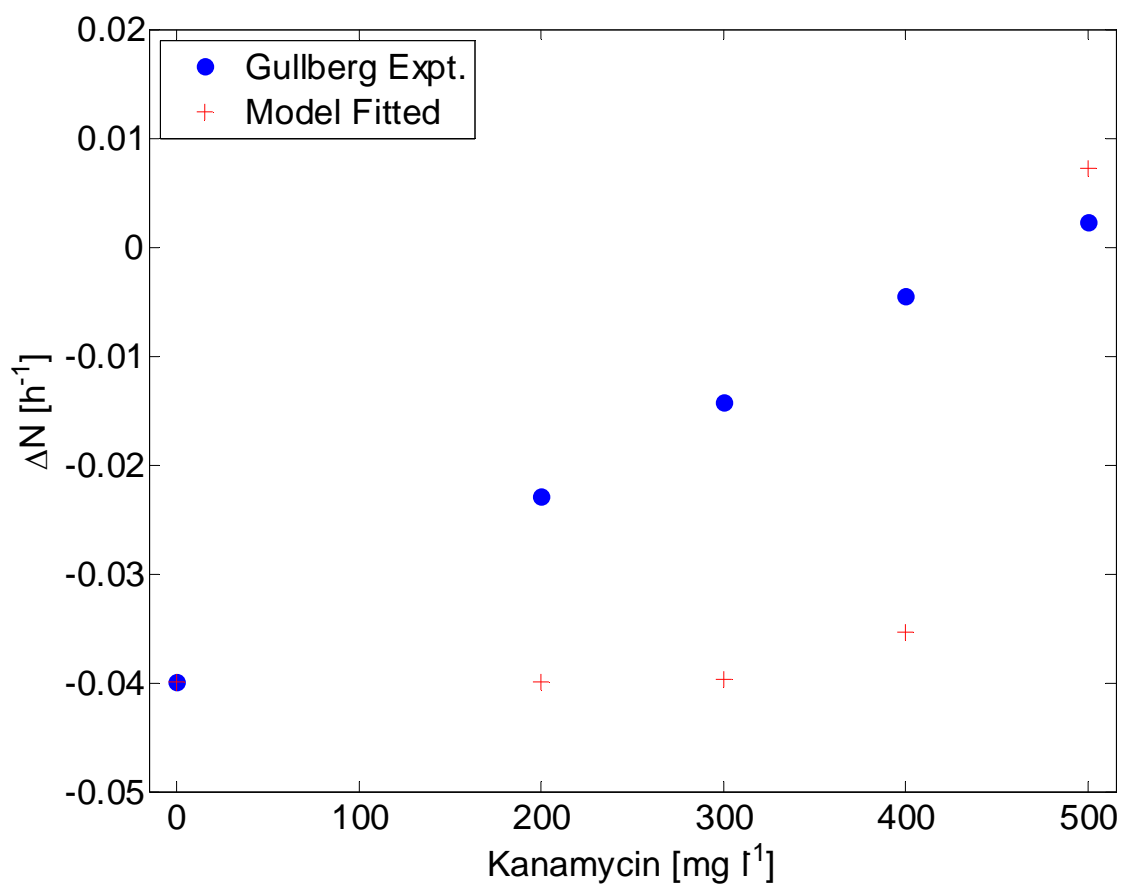

**Fig. S6.** Model fit to published (11) average growth rate differences ( $\Delta N$ ) for kanamycin [ $\text{mg l}^{-1}$ ], employing *Escherichia coli* (data from , 11), fitting  $\kappa$  only ( $N_{\min} = -2$ ).

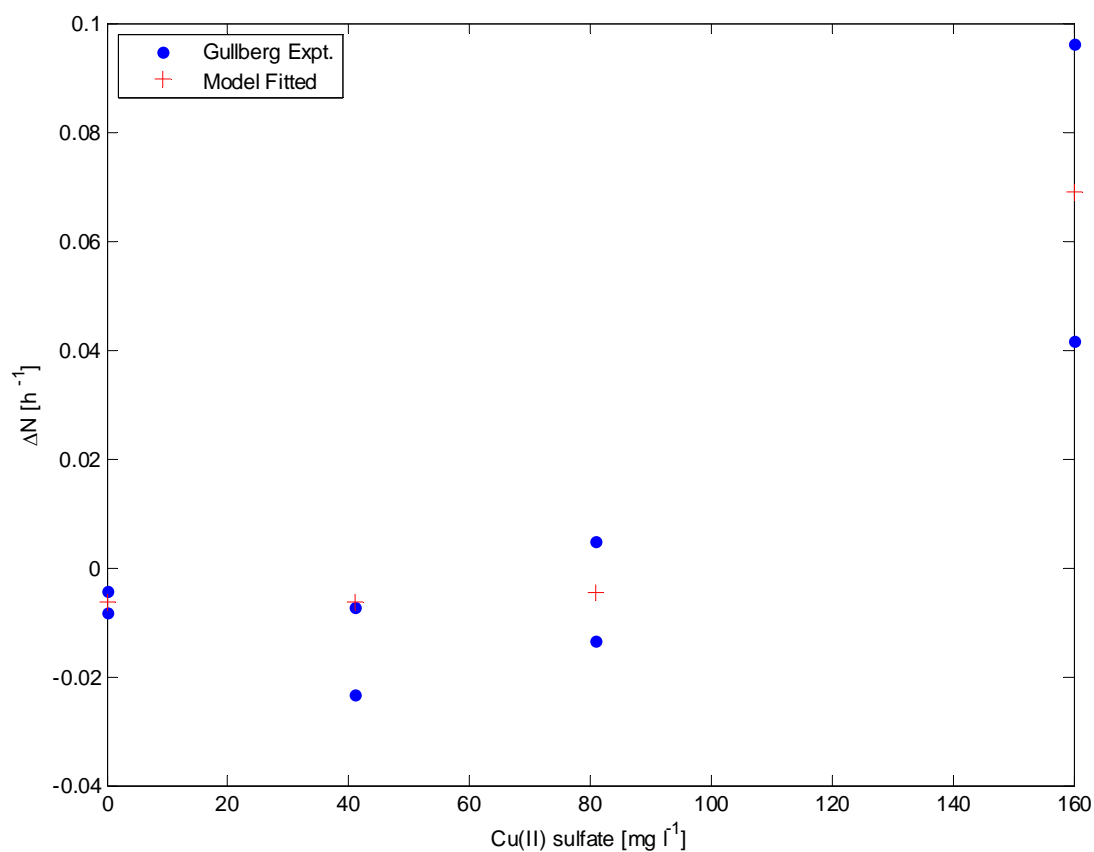

**Fig. S7.** Model fit to published (11) individual experimental growth rate differences ( $\Delta N$ ) for Cu(II) sulfate [ $\text{mg l}^{-1}$ ], employing *Escherichia coli* (data from , 11), fitting both  $\kappa$  and  $N_{\min}$ . Individual experimental results ( $n = 8$ ) were plotted instead of average results for each concentration ( $n = 4$ ) to achieve a sufficient sample size for the nonlinear model fit.

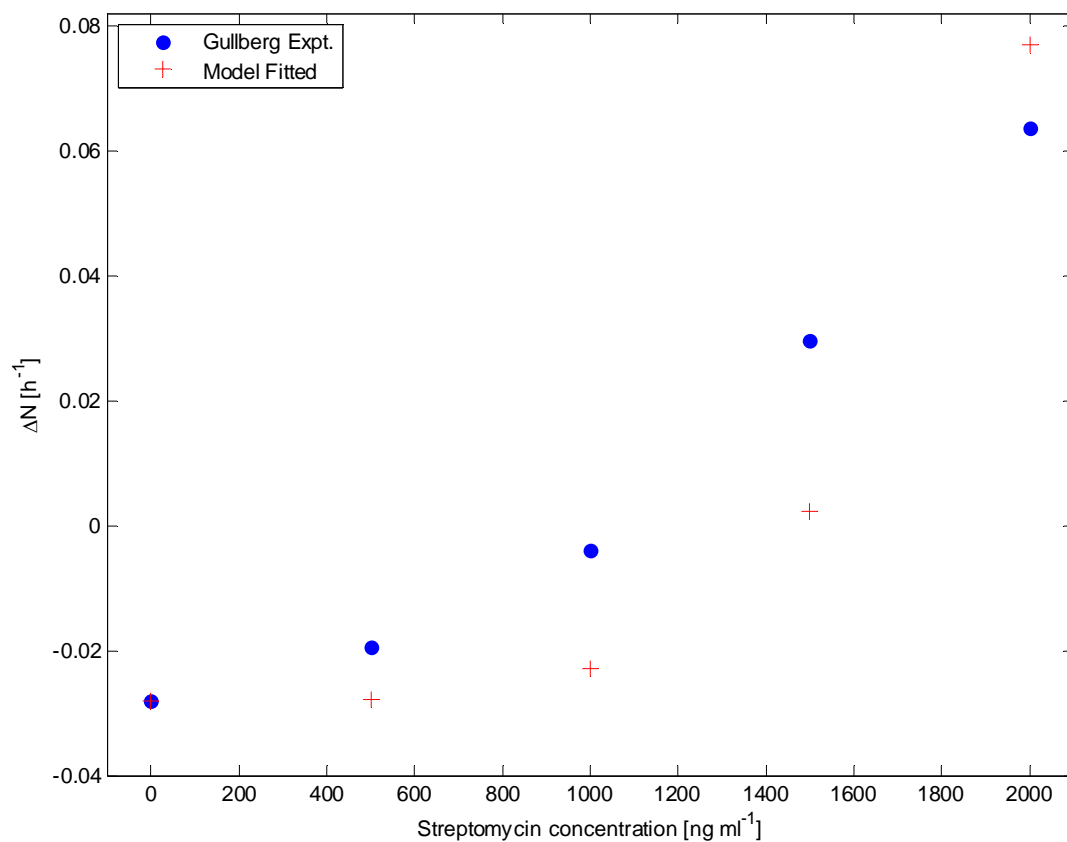

**Fig. S8.** Model fit to published (8) average growth rate differences ( $\Delta N$ ) for streptomycin, employing *Salmonella enterica* serovar Typhimurium (data from , 8), fitting  $\kappa$  only ( $N_{\min} = -2$ ).

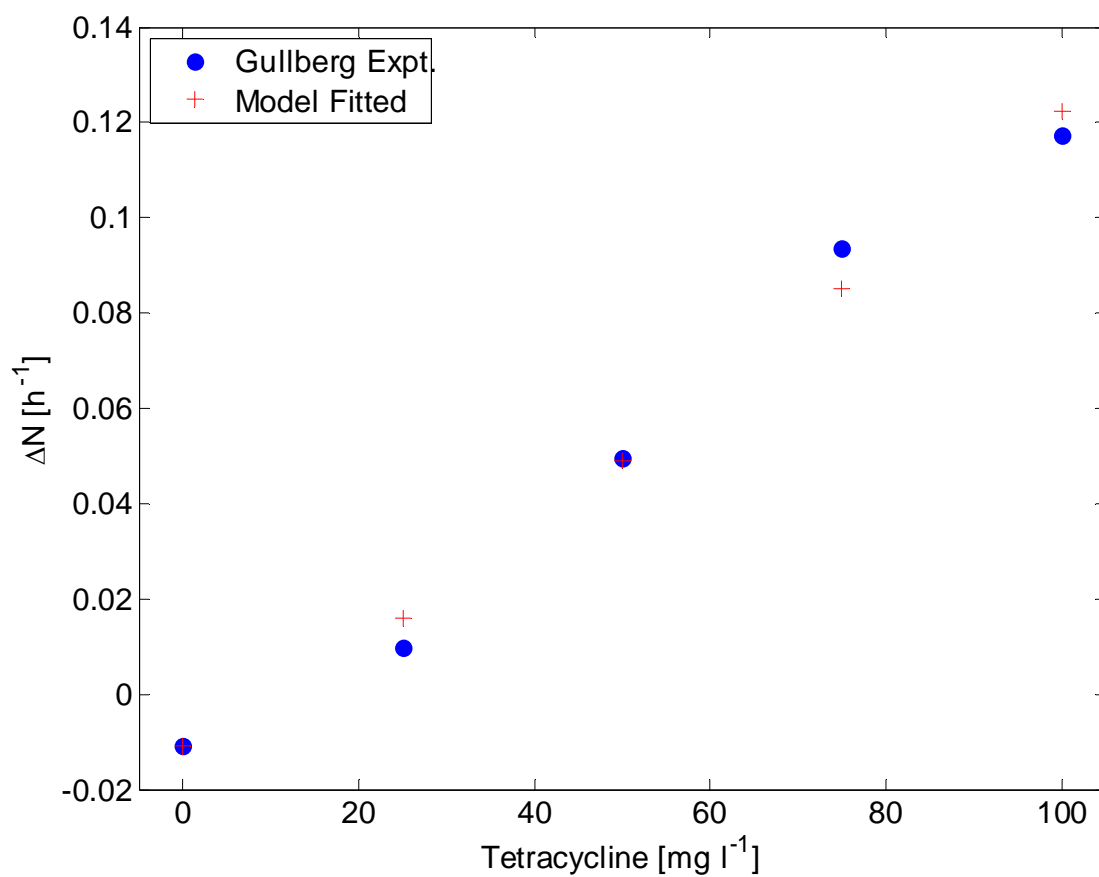

**Fig. S9.** Model fit to published (8) average growth rate differences ( $\Delta N$ ) for tetracycline, employing *Salmonella enterica* serovar Typhimurium (data from , 8), fitting  $\kappa$  only ( $N_{\min} = -2$ ).

## References for Supplemental Material

1. **Dykhuisen D.** 1990. Experimental studies of natural selection in bacteria. *Annu Rev Ecol Syst* **21**:373–398.
2. **Martinez JL.** 2009. Environmental pollution by antibiotics and by antibiotic resistance determinants. *Environ Pollut* **157**:2893–2902.
3. **Komp Lindgren P, Marcusson LL, Sandvang D, Frimodt-Møller N, Hughes D.** 2005. Biological cost of single and multiple norfloxacin resistance mutations in *Escherichia coli* implicated in urinary tract infections. *Antimicrob Agents Chemother* **49**:2343–51.
4. **Hermsen R, Deris JB, Hwa T.** 2012. On the rapidity of antibiotic resistance evolution facilitated by a concentration gradient. *Proc Natl Acad Sci U S A* **109**:10775–80.
5. **Levin BR, Perrot V, Walker N.** 2000. Compensatory mutations, antibiotic resistance and the population genetics of adaptive evolution in bacteria. *Genetics* **154**:985–997.
6. **Marcusson LL, Frimodt-Møller N, Hughes D.** 2009. Interplay in the selection of fluoroquinolone resistance and bacterial fitness. *PLoS Pathog* **5**:e1000541.
7. **Andersson DI, Hughes D.** 2012. Evolution of antibiotic resistance at non-lethal drug concentrations. *Drug Resist Updat* **15**:162–172.
8. **Gullberg E, Cao S, Berg OG, Ilbäck C, Sandegren L, Hughes D, Andersson DI.** 2011. Selection of resistant bacteria at very low antibiotic concentrations. *PLoS Pathog* **7**:e1002158.
9. **Day T, Huijben S, Read AF.** 2015. Is selection relevant in the evolutionary emergence of drug resistance? *Trends Microbiol* **23**:126–133.
10. **Melnyk AH, Wong A, Kassen R.** 2015. The fitness costs of antibiotic resistance mutations. *Evol Appl* **8**:273–283.
11. **Gullberg E, Albrecht LM, Karlsson C, Sandegren L, Andersson DI.** 2014. Selection of a multidrug resistance plasmid by sublethal levels of antibiotics and heavy metals. *MBio* **5**:19–23.
12. **Wold S.** 1991. Validation of QSAR's. *Quant Struct Relationships* **10**:191–193.

13. **Ankomah P, Johnson PJTP, Levin BR.** 2013. The pharmaco-, population and evolutionary dynamics of multi-drug therapy: experiments with *S. aureus* and *E. coli* and computer simulations. *PLoS Pathog* **9**:e1003300.
14. **Regoes RR, Wiuff C, Zappala RM, Garner KN, Baquero F, Levin BR.** 2004. Pharmacodynamic functions: a multiparameter approach to the design of antibiotic treatment regimens. *Antimicrob Agents Chemother* **48**:3670–6.
